# Supplementary material for: Geological events and Pliocene climate fluctuations explain the phylogeographical pattern of the cold water fish Rhynchocypris oxycephalus (Cypriniformes: Cyprinidae) in China
Source: PubMed Central journal article supplement (PMC4219125; doi:10.1186/s12862-014-0225-9), 2014-10-25
Supplement: 12862_2014_225_MOESM1_ESM.pdf [file 12862_2014_225_MOESM1_ESM.pdf]

**Table S1** Summary of sampling localities for *Rhynchocypris oxycephalus* and outgroups. The locality numbers correspond to Figure 1. Site, coordinates (longitude/latitude), sample size, voucher ID number, *Cytb* haplotype and identified lineages, nuclear clade, and GenBank accession number for *Cytb* and *RAG2* are presented.

| Species               | Site (number) | Longitude | Latitude | Sample size | Voucher No. | <i>Cytb</i> Hap | MtDNA Lineage | <i>RAG2</i> clade | GenBank Accession No. |             |
|-----------------------|---------------|-----------|----------|-------------|-------------|-----------------|---------------|-------------------|-----------------------|-------------|
|                       |               |           |          |             |             |                 |               |                   | <i>Cytb</i>           | <i>RAG2</i> |
| Ingroup               |               |           |          |             |             |                 |               |                   |                       |             |
| <i>R. oxycephalus</i> | 1             | 119.67    | 30.37    | 29          | 20101449    | hap 1           | C2            |                   | KM675120              |             |
|                       |               |           |          |             | 20101450    | hap 1           | C2            |                   | KM675120              |             |
|                       |               |           |          |             | 20101451    | hap 1           | C2            |                   | KM675120              |             |
|                       |               |           |          |             | 20101452    | hap 4           | C2            |                   | KM675123              |             |
|                       |               |           |          |             | 20101453    | hap 1           | C2            |                   | KM675120              |             |
|                       |               |           |          |             | 20101454    | hap 1           | C2            |                   | KM675120              |             |
|                       |               |           |          |             | 20101455    | hap 1           | C2            |                   | KM675120              |             |
|                       |               |           |          |             | 20101456    | hap 4           | C2            |                   | KM675123              |             |
|                       |               |           |          |             | 20101457    | hap 1           | C2            | III               | KM675120              | KM675074    |
|                       |               |           |          |             | 20101458    | hap 4           | C2            | III               | KM675123              | KM675074    |
|                       |               |           |          |             | 20101459    | hap 1           | C2            |                   | KM675120              |             |
|                       |               |           |          |             | 20101460    | hap 1           | C2            |                   | KM675120              |             |
|                       |               |           |          |             | 20101461    | hap 4           | C2            |                   | KM675123              |             |
|                       |               |           |          |             | 20101463    | hap 1           | C2            |                   | KM675120              |             |
|                       |               |           |          |             | 20101464    | hap 1           | C2            |                   | KM675120              |             |
|                       |               |           |          |             | 20101465    | hap 1           | C2            |                   | KM675120              |             |
|                       |               |           |          |             | 20101466    | hap 1           | C2            |                   | KM675120              |             |
|                       |               |           |          |             | 20101467    | hap 1           | C2            |                   | KM675120              |             |
|                       |               |           |          |             | 20101468    | hap 1           | C2            |                   | KM675120              |             |
|                       |               |           |          |             | 20101469    | hap 4           | C2            |                   | KM675123              |             |

|   |        |       |    |          |       |    |     |          |          |
|---|--------|-------|----|----------|-------|----|-----|----------|----------|
|   |        |       |    | 20101470 | hap 1 | C2 |     | KM675120 |          |
|   |        |       |    | 20101471 | hap 1 | C2 |     | KM675120 |          |
|   |        |       |    | 20101472 | hap 1 | C2 |     | KM675120 |          |
|   |        |       |    | 20101473 | hap 1 | C2 |     | KM675120 |          |
|   |        |       |    | 20101474 | hap 1 | C2 |     | KM675120 |          |
|   |        |       |    | 20101475 | hap 1 | C2 |     | KM675120 |          |
|   |        |       |    | 20101476 | hap 4 | C2 |     | KM675123 |          |
|   |        |       |    | 20101477 | hap 1 | C2 |     | KM675120 |          |
|   |        |       |    | 20101478 | hap 1 | C2 |     | KM675120 |          |
| 2 | 119.65 | 30.42 | 21 | 20101336 | hap 5 | C2 |     | KM675124 |          |
|   |        |       |    | 20101337 | hap 5 | C2 |     | KM675124 |          |
|   |        |       |    | 20101338 | hap 5 | C2 |     | KM675124 |          |
|   |        |       |    | 20101339 | hap 5 | C2 | III | KM675124 | KM675061 |
|   |        |       |    | 20101340 | hap 5 | C2 |     | KM675124 |          |
|   |        |       |    | 20101341 | hap 5 | C2 |     | KM675124 |          |
|   |        |       |    | 20101342 | hap 5 | C2 |     | KM675124 |          |
|   |        |       |    | 20101343 | hap 5 | C2 |     | KM675124 |          |
|   |        |       |    | 20101345 | hap 5 | C2 |     | KM675124 |          |
|   |        |       |    | 20101346 | hap 5 | C2 |     | KM675124 |          |
|   |        |       |    | 20101347 | hap 5 | C2 |     | KM675124 |          |
|   |        |       |    | 20101348 | hap 5 | C2 |     | KM675124 |          |
|   |        |       |    | 20101349 | hap 5 | C2 |     | KM675124 |          |
|   |        |       |    | 20101350 | hap 5 | C2 |     | KM675124 |          |
|   |        |       |    | 20101351 | hap 2 | C2 |     | KM675121 |          |
|   |        |       |    | 20101352 | hap 2 | C2 | III | KM675121 | KM675061 |
|   |        |       |    | 20101353 | hap 2 | C2 |     | KM675121 |          |

|   |        |       |    |          |        |    |     |          |          |
|---|--------|-------|----|----------|--------|----|-----|----------|----------|
|   |        |       |    | 20101354 | hap 2  | C2 |     | KM675121 |          |
|   |        |       |    | 20101355 | hap 2  | C2 |     | KM675121 |          |
|   |        |       |    | 20101356 | hap 2  | C2 |     | KM675121 |          |
|   |        |       |    | 20101357 | hap 2  | C2 |     | KM675121 |          |
| 3 | 119.41 | 30.42 | 23 | 20101203 | hap 6  | C2 | III | KM675125 | KM675110 |
|   |        |       |    | 20101204 | hap 8  | C2 |     | KM675127 |          |
|   |        |       |    | 20101205 | hap 8  | C2 |     | KM675127 |          |
|   |        |       |    | 20101206 | hap 8  | C2 |     | KM675127 |          |
|   |        |       |    | 20101207 | hap 8  | C2 |     | KM675127 |          |
|   |        |       |    | 20101208 | hap 8  | C2 |     | KM675127 |          |
|   |        |       |    | 20101209 | hap 6  | C2 |     | KM675125 |          |
|   |        |       |    | 20101210 | hap 8  | C2 |     | KM675127 |          |
|   |        |       |    | 20101211 | hap 8  | C2 | III | KM675127 | KM675111 |
|   |        |       |    | 20101212 | hap 8  | C2 |     | KM675127 |          |
|   |        |       |    | 20101213 | hap 8  | C2 |     | KM675127 |          |
|   |        |       |    | 20101214 | hap 12 | C2 |     | KM675131 |          |
|   |        |       |    | 20101215 | hap 6  | C2 |     | KM675125 |          |
|   |        |       |    | 20101216 | hap 6  | C2 |     | KM675125 |          |
|   |        |       |    | 20101217 | hap 6  | C2 |     | KM675125 |          |
|   |        |       |    | 20101218 | hap 6  | C2 |     | KM675125 |          |
|   |        |       |    | 20101219 | hap 6  | C2 |     | KM675125 |          |
|   |        |       |    | 20101220 | hap 6  | C2 |     | KM675125 |          |
|   |        |       |    | 20101221 | hap 6  | C2 |     | KM675125 |          |
|   |        |       |    | 20101222 | hap 6  | C2 |     | KM675125 |          |
|   |        |       |    | 20101223 | hap 6  | C2 |     | KM675125 |          |
|   |        |       |    | 20101224 | hap 6  | C2 |     | KM675125 |          |

|         |        |       |    |          |        |    |     |          |          |
|---------|--------|-------|----|----------|--------|----|-----|----------|----------|
| 4       | 119.42 | 30.41 | 10 | 20101225 | hap 6  | C2 |     | KM675125 |          |
|         |        |       |    | 20101159 | hap 7  | C2 |     | KM675126 |          |
|         |        |       |    | 20101161 | hap 8  | C2 |     | KM675127 |          |
|         |        |       |    | 20101163 | hap 8  | C2 |     | KM675127 |          |
|         |        |       |    | 20101164 | hap 11 | C2 | III | KM675127 | KM675061 |
|         |        |       |    | 20101166 | hap 8  | C2 |     | KM675127 |          |
|         |        |       |    | 20101169 | hap 8  | C2 |     | KM675127 |          |
|         |        |       |    | 20101170 | hap 8  | C2 |     | KM675127 |          |
|         |        |       |    | 20101171 | hap 7  | C2 | III | KM675126 | KM675061 |
|         |        |       |    | 20101175 | hap 8  | C2 |     | KM675127 |          |
| 5       | 120.1  | 30.25 | 23 | 20101176 | hap 8  | C2 |     | KM675127 |          |
|         |        |       |    | 1004002  | hap 3  | C2 |     | KM675122 |          |
|         |        |       |    | 1004003  | hap 3  | C2 |     | KM675122 |          |
|         |        |       |    | 1004004  | hap 9  | C2 |     | KM675128 |          |
|         |        |       |    | 1004005  | hap 3  | C2 |     | KM675122 |          |
|         |        |       |    | 1004007  | hap 3  | C2 |     | KM675122 |          |
|         |        |       |    | 1004008  | hap 10 | C2 | III | KM675129 | KM675067 |
|         |        |       |    | 1004010  | hap 3  | C2 |     | KM675122 |          |
|         |        |       |    | 1004012  | hap 3  | C2 |     | KM675122 |          |
|         |        |       |    | 1004014  | hap 3  | C2 | III | KM675122 | KM675067 |
|         |        |       |    | 1004015  | hap 3  | C2 |     | KM675122 |          |
|         |        |       |    | 1004016  | hap 3  | C2 |     | KM675122 |          |
|         |        |       |    | 1004018  | hap 3  | C2 |     | KM675122 |          |
| 1004019 | hap 3  | C2    |    | KM675122 |        |    |     |          |          |
| 1004020 | hap 3  | C2    |    | KM675122 |        |    |     |          |          |
| 1004021 | hap 3  | C2    |    | KM675122 |        |    |     |          |          |

|   |        |       |    |          |        |    |     |          |          |
|---|--------|-------|----|----------|--------|----|-----|----------|----------|
|   |        |       |    | 1004022  | hap 3  | C2 |     | KM675122 |          |
|   |        |       |    | 1004024  | hap 3  | C2 |     | KM675122 |          |
|   |        |       |    | 1004025  | hap 3  | C2 |     | KM675122 |          |
|   |        |       |    | 1004026  | hap 3  | C2 |     | KM675122 |          |
|   |        |       |    | 1004027  | hap 3  | C2 |     | KM675122 |          |
|   |        |       |    | 1004028  | hap 3  | C2 |     | KM675122 |          |
|   |        |       |    | 1004029  | hap 3  | C2 |     | KM675122 |          |
|   |        |       |    | 1004031  | hap 3  | C2 |     | KM675122 |          |
| 6 | 121.1  | 29.71 | 16 | 20101253 | hap 13 | C2 |     | KM675132 |          |
|   |        |       |    | 20101254 | hap 15 | C2 |     | KM675134 |          |
|   |        |       |    | 20101256 | hap 14 | C2 | III | KM675133 | KM675085 |
|   |        |       |    | 20101257 | hap 13 | C2 |     | KM675132 |          |
|   |        |       |    | 20101259 | hap 13 | C2 | III | KM675132 | KM675071 |
|   |        |       |    | 20101260 | hap 14 | C2 |     | KM675133 |          |
|   |        |       |    | 20101261 | hap 13 | C2 |     | KM675132 |          |
|   |        |       |    | 20101262 | hap 14 | C2 |     | KM675133 |          |
|   |        |       |    | 20101263 | hap 14 | C2 |     | KM675133 |          |
|   |        |       |    | 20101264 | hap 13 | C2 |     | KM675132 |          |
|   |        |       |    | 20101265 | hap 13 | C2 |     | KM675132 |          |
|   |        |       |    | 20101266 | hap 14 | C2 |     | KM675133 |          |
|   |        |       |    | 20101268 | hap 13 | C2 |     | KM675132 |          |
|   |        |       |    | 20101271 | hap 13 | C2 |     | KM675132 |          |
|   |        |       |    | 20101272 | hap 18 | C2 |     | KM675137 |          |
|   |        |       |    | 20101274 | hap 14 | C2 |     | KM675133 |          |
| 7 | 120.56 | 29.63 | 26 | 20101131 | hap 17 | C2 |     | KM675136 |          |
|   |        |       |    | 20101132 | hap 17 | C2 |     | KM675136 |          |

|   |        |       |    |          |        |    |     |          |          |
|---|--------|-------|----|----------|--------|----|-----|----------|----------|
|   |        |       |    | 20101133 | hap 17 | C2 |     | KM675136 |          |
|   |        |       |    | 20101134 | hap 17 | C2 |     | KM675136 |          |
|   |        |       |    | 20101135 | hap 19 | C2 |     | KM675138 |          |
|   |        |       |    | 20101136 | hap 17 | C2 |     | KM675136 |          |
|   |        |       |    | 20101137 | hap 17 | C2 |     | KM675136 |          |
|   |        |       |    | 20101138 | hap 16 | C2 |     | KM675135 |          |
|   |        |       |    | 20101139 | hap 17 | C2 |     | KM675136 |          |
|   |        |       |    | 20101140 | hap 17 | C2 |     | KM675136 |          |
|   |        |       |    | 20101141 | hap 17 | C2 |     | KM675136 |          |
|   |        |       |    | 20101142 | hap 17 | C2 |     | KM675136 |          |
|   |        |       |    | 20101143 | hap 21 | C2 |     | KM675140 |          |
|   |        |       |    | 20101144 | hap 17 | C2 |     | KM675136 |          |
|   |        |       |    | 20101145 | hap 17 | C2 | III | KM675136 | KM675070 |
|   |        |       |    | 20101146 | hap 17 | C2 |     | KM675136 |          |
|   |        |       |    | 20101148 | hap 17 | C2 |     | KM675136 |          |
|   |        |       |    | 20101149 | hap 17 | C2 |     | KM675136 |          |
|   |        |       |    | 20101150 | hap 17 | C2 |     | KM675136 |          |
|   |        |       |    | 20101151 | hap 17 | C2 |     | KM675136 |          |
|   |        |       |    | 20101152 | hap 17 | C2 |     | KM675136 |          |
|   |        |       |    | 20101153 | hap 17 | C2 |     | KM675136 |          |
|   |        |       |    | 20101154 | hap 17 | C2 |     | KM675136 |          |
|   |        |       |    | 20101155 | hap 17 | C2 |     | KM675136 |          |
|   |        |       |    | 20101156 | hap 17 | C2 |     | KM675136 |          |
|   |        |       |    | 20101157 | hap 17 | C2 |     | KM675136 |          |
| 8 | 119.71 | 29.70 | 20 | 20101110 | hap 24 | C2 | III | KM675116 | KM675067 |
|   |        |       |    | 20101111 | hap 27 | C2 |     | KM675143 |          |

9

120.07

30.20

28

|          |        |    |     |          |          |
|----------|--------|----|-----|----------|----------|
| 20101112 | hap 26 | C2 |     | KM675142 |          |
| 20101113 | hap 22 | C2 | III | KM675114 | KM675073 |
| 20101114 | hap 27 | C2 |     | KM675143 |          |
| 20101115 | hap 27 | C2 | III | KM675143 | KM675073 |
| 20101116 | hap 26 | C2 |     | KM675142 |          |
| 20101117 | hap 23 | C2 |     | KM675115 |          |
| 20101118 | hap 27 | C2 |     | KM675143 |          |
| 20101119 | hap 26 | C2 |     | KM675142 |          |
| 20101120 | hap 27 | C2 |     | KM675143 |          |
| 20101121 | hap 27 | C2 |     | KM675143 |          |
| 20101122 | hap 27 | C2 |     | KM675143 |          |
| 20101123 | hap 27 | C2 |     | KM675143 |          |
| 20101124 | hap 27 | C2 |     | KM675143 |          |
| 20101125 | hap 25 | C2 |     | KM675141 |          |
| 20101127 | hap 29 | C2 |     | KM675145 |          |
| 20101128 | hap 20 | C2 |     | KM675139 |          |
| 20101129 | hap 20 | C2 |     | KM675139 |          |
| 20101130 | hap 20 | C2 | III | KM675139 | KM675073 |
| 1004029  | hap 27 | C2 |     | KM675143 |          |
| 1004030  | hap 27 | C2 |     | KM675143 |          |
| 1004031  | hap 27 | C2 |     | KM675143 |          |
| 1004032  | hap 27 | C2 |     | KM675143 |          |
| 1004033  | hap 27 | C2 |     | KM675143 |          |
| 1004034  | hap 27 | C2 |     | KM675143 |          |
| 1004035  | hap 27 | C2 |     | KM675143 |          |
| 1004036  | hap 27 | C2 |     | KM675143 |          |

|    |        |       |    |          |        |    |     |          |          |
|----|--------|-------|----|----------|--------|----|-----|----------|----------|
|    |        |       |    | 1004037  | hap 27 | C2 |     | KM675143 |          |
|    |        |       |    | 1004039  | hap 27 | C2 |     | KM675143 |          |
|    |        |       |    | 1004040  | hap 27 | C2 |     | KM675143 |          |
|    |        |       |    | 1004041  | hap 27 | C2 |     | KM675143 |          |
|    |        |       |    | 1004042  | hap 27 | C2 |     | KM675143 |          |
|    |        |       |    | 1004043  | hap 27 | C2 |     | KM675143 |          |
|    |        |       |    | 1004044  | hap 27 | C2 |     | KM675143 |          |
|    |        |       |    | 1004045  | hap 27 | C2 |     | KM675143 |          |
|    |        |       |    | 1004046  | hap 27 | C2 |     | KM675143 |          |
|    |        |       |    | 1004047  | hap 27 | C2 |     | KM675143 |          |
|    |        |       |    | 1004048  | hap 27 | C2 |     | KM675143 |          |
|    |        |       |    | 1004049  | hap 27 | C2 |     | KM675143 |          |
|    |        |       |    | 1004050  | hap 27 | C2 |     | KM675143 |          |
|    |        |       |    | 1004051  | hap 27 | C2 | III | KM675143 | KM675067 |
|    |        |       |    | 1004052  | hap 27 | C2 |     | KM675143 |          |
|    |        |       |    | 1004053  | hap 27 | C2 |     | KM675143 |          |
|    |        |       |    | 1004054  | hap 27 | C2 |     | KM675143 |          |
|    |        |       |    | 1004055  | hap 27 | C2 |     | KM675143 |          |
|    |        |       |    | 1004056  | hap 27 | C2 |     | KM675143 |          |
|    |        |       |    | 1004057  | hap 27 | C2 |     | KM675143 |          |
|    |        |       |    | 1004058  | hap 27 | C2 |     | KM675143 |          |
| 10 | 118.14 | 29.11 | 23 | 20101358 | hap 28 | C2 | III | KM675144 | KM675080 |
|    |        |       |    | 20101359 | hap 29 | C2 |     | KM675145 |          |
|    |        |       |    | 20101360 | hap 29 | C2 |     | KM675145 |          |
|    |        |       |    | 20101361 | hap 30 | C2 |     | KM675146 |          |
|    |        |       |    | 20101362 | hap 30 | C2 |     | KM675146 |          |



11                      119.83            28.83            26

|          |        |    |     |          |          |
|----------|--------|----|-----|----------|----------|
| 20101363 | hap 28 | C2 |     | KM675144 |          |
| 20101364 | hap 30 | C2 |     | KM675146 |          |
| 20101365 | hap 29 | C2 | III | KM675145 | KM675066 |
| 20101366 | hap 29 | C2 |     | KM675145 |          |
| 20101367 | hap 28 | C2 |     | KM675144 |          |
| 20101368 | hap 28 | C2 |     | KM675144 |          |
| 20101369 | hap 30 | C2 |     | KM675146 |          |
| 20101370 | hap 28 | C2 |     | KM675144 |          |
| 20101371 | hap 30 | C2 |     | KM675146 |          |
| 20101372 | hap 28 | C2 |     | KM675144 |          |
| 20101619 | hap 28 | C2 |     | KM675144 |          |
| 20101621 | hap 36 | C2 | III | KM675152 | KM675086 |
| 20101622 | hap 29 | C2 |     | KM675145 |          |
| 20101624 | hap 29 | C2 |     | KM675145 |          |
| 20101625 | hap 28 | C2 |     | KM675144 |          |
| 20101626 | hap 28 | C2 |     | KM675144 |          |
| 20101627 | hap 28 | C2 |     | KM675144 |          |
| 20101628 | hap 35 | C2 | III | KM675151 | KM675080 |
| 20101373 | hap 32 | C2 |     | KM675148 |          |
| 20101375 | hap 32 | C2 |     | KM675148 |          |
| 20101376 | hap 32 | C2 |     | KM675148 |          |
| 20101377 | hap 32 | C2 |     | KM675148 |          |
| 20101378 | hap 32 | C2 |     | KM675148 |          |
| 20101379 | hap 32 | C2 |     | KM675148 |          |
| 20101380 | hap 32 | C2 |     | KM675148 |          |
| 20101381 | hap 32 | C2 |     | KM675148 |          |

|    |        |       |    |          |        |    |     |          |          |
|----|--------|-------|----|----------|--------|----|-----|----------|----------|
|    |        |       |    | 20101382 | hap 31 | C2 | III | KM675147 | KM675061 |
|    |        |       |    | 20101383 | hap 32 | C2 |     | KM675148 |          |
|    |        |       |    | 20101384 | hap 38 | C2 |     | KM675154 |          |
|    |        |       |    | 20101385 | hap 32 | C2 |     | KM675148 |          |
|    |        |       |    | 20101386 | hap 41 | C2 |     | KM675157 |          |
|    |        |       |    | 20101387 | hap 32 | C2 |     | KM675148 |          |
|    |        |       |    | 20101388 | hap 32 | C2 |     | KM675148 |          |
|    |        |       |    | 20101389 | hap 32 | C2 |     | KM675148 |          |
|    |        |       |    | 20101390 | hap 32 | C2 |     | KM675148 |          |
|    |        |       |    | 20101391 | hap 32 | C2 |     | KM675148 |          |
|    |        |       |    | 20101392 | hap 32 | C2 |     | KM675148 |          |
|    |        |       |    | 20101393 | hap 32 | C2 |     | KM675148 |          |
|    |        |       |    | 20101394 | hap 32 | C2 |     | KM675148 |          |
|    |        |       |    | 20101395 | hap 32 | C2 |     | KM675148 |          |
|    |        |       |    | 20101396 | hap 32 | C2 |     | KM675148 |          |
|    |        |       |    | 20101397 | hap 32 | C2 |     | KM675148 |          |
|    |        |       |    | 20101398 | hap 32 | C2 | III | KM675148 | KM675061 |
|    |        |       |    | 20101399 | hap 32 | C2 |     | KM675148 |          |
| 12 | 118.32 | 30.08 | 22 | 20101179 | hap 53 | C2 | III | KM675169 | KM675075 |
|    |        |       |    | 20101180 | hap 53 | C2 |     | KM675169 |          |
|    |        |       |    | 20101181 | hap 53 | C2 |     | KM675169 |          |
|    |        |       |    | 20101183 | hap 53 | C2 |     | KM675169 |          |
|    |        |       |    | 20101184 | hap 53 | C2 |     | KM675169 |          |
|    |        |       |    | 20101185 | hap 53 | C2 |     | KM675169 |          |
|    |        |       |    | 20101186 | hap 53 | C2 |     | KM675169 |          |
|    |        |       |    | 20101187 | hap 53 | C2 |     | KM675169 |          |

|    |        |       |    |          |        |    |     |          |          |
|----|--------|-------|----|----------|--------|----|-----|----------|----------|
|    |        |       |    | 20101188 | hap 53 | C2 |     | KM675169 |          |
|    |        |       |    | 20101189 | hap 53 | C2 |     | KM675169 |          |
|    |        |       |    | 20101190 | hap 53 | C2 |     | KM675169 |          |
|    |        |       |    | 20101191 | hap 53 | C2 |     | KM675169 |          |
|    |        |       |    | 20101192 | hap 53 | C2 |     | KM675169 |          |
|    |        |       |    | 20101193 | hap 53 | C2 |     | KM675169 |          |
|    |        |       |    | 20101194 | hap 53 | C2 |     | KM675169 |          |
|    |        |       |    | 20101195 | hap 53 | C2 |     | KM675169 |          |
|    |        |       |    | 20101196 | hap 53 | C2 |     | KM675169 |          |
|    |        |       |    | 20101197 | hap 54 | C2 | III | KM675170 | KM675075 |
|    |        |       |    | 20101198 | hap 53 | C2 |     | KM675169 |          |
|    |        |       |    | 20101199 | hap 53 | C2 |     | KM675169 |          |
|    |        |       |    | 20101201 | hap 53 | C2 |     | KM675169 |          |
|    |        |       |    | 20101202 | hap 53 | C2 |     | KM675169 |          |
| 13 | 120.46 | 29.00 | 26 | 20101306 | hap 39 | C2 | III | KM675155 | KM675082 |
|    |        |       |    | 20101307 | hap 34 | C2 |     | KM675150 |          |
|    |        |       |    | 20101308 | hap 34 | C2 |     | KM675150 |          |
|    |        |       |    | 20101309 | hap 33 | C2 |     | KM675149 |          |
|    |        |       |    | 20101310 | hap 33 | C2 |     | KM675149 |          |
|    |        |       |    | 20101312 | hap 33 | C2 |     | KM675149 |          |
|    |        |       |    | 20101313 | hap 33 | C2 |     | KM675149 |          |
|    |        |       |    | 20101314 | hap 33 | C2 |     | KM675149 |          |
|    |        |       |    | 20101315 | hap 33 | C2 |     | KM675149 |          |
|    |        |       |    | 20101316 | hap 33 | C2 |     | KM675149 |          |
|    |        |       |    | 20101317 | hap 33 | C2 |     | KM675149 |          |
|    |        |       |    | 20101318 | hap 33 | C2 |     | KM675149 |          |

14

120.57

28.51

26

|          |        |    |     |          |          |
|----------|--------|----|-----|----------|----------|
| 20101319 | hap 34 | C2 |     | KM675150 |          |
| 20101321 | hap 33 | C2 |     | KM675149 |          |
| 20101322 | hap 33 | C2 |     | KM675149 |          |
| 20101323 | hap 33 | C2 |     | KM675149 |          |
| 20101324 | hap 34 | C2 |     | KM675150 |          |
| 20101325 | hap 33 | C2 |     | KM675149 |          |
| 20101326 | hap 34 | C2 | III | KM675150 | KM675072 |
| 20101327 | hap 33 | C2 |     | KM675149 |          |
| 20101328 | hap 33 | C2 |     | KM675149 |          |
| 20101329 | hap 33 | C2 | III | KM675149 | KM675072 |
| 20101331 | hap 33 | C2 |     | KM675149 |          |
| 20101332 | hap 33 | C2 |     | KM675149 |          |
| 20101334 | hap 33 | C2 |     | KM675149 |          |
| 20101335 | hap 37 | C2 | III | KM675153 | KM675082 |
| 20101226 | hap 40 | C2 |     | KM675156 |          |
| 20101227 | hap 40 | C2 |     | KM675156 |          |
| 20101228 | hap 40 | C2 |     | KM675156 |          |
| 20101229 | hap 40 | C2 | III | KM675156 | KM675061 |
| 20101230 | hap 40 | C2 |     | KM675156 |          |
| 20101231 | hap 40 | C2 |     | KM675156 |          |
| 20101232 | hap 40 | C2 |     | KM675156 |          |
| 20101233 | hap 40 | C2 |     | KM675156 |          |
| 20101234 | hap 40 | C2 |     | KM675156 |          |
| 20101235 | hap 40 | C2 |     | KM675156 |          |
| 20101236 | hap 40 | C2 |     | KM675156 |          |
| 20101237 | hap 40 | C2 |     | KM675156 |          |

15

118.46

28.33

27

|          |        |    |     |          |          |
|----------|--------|----|-----|----------|----------|
| 20101238 | hap 40 | C2 |     | KM675156 |          |
| 20101239 | hap 40 | C2 |     | KM675156 |          |
| 20101240 | hap 40 | C2 |     | KM675156 |          |
| 20101241 | hap 40 | C2 |     | KM675156 |          |
| 20101242 | hap 40 | C2 |     | KM675156 |          |
| 20101243 | hap 40 | C2 |     | KM675156 |          |
| 20101244 | hap 40 | C2 |     | KM675156 |          |
| 20101245 | hap 40 | C2 |     | KM675156 |          |
| 20101246 | hap 40 | C2 |     | KM675156 |          |
| 20101247 | hap 40 | C2 |     | KM675156 |          |
| 20101248 | hap 40 | C2 |     | KM675156 |          |
| 20101249 | hap 40 | C2 |     | KM675156 |          |
| 20101250 | hap 40 | C2 |     | KM675156 |          |
| 20101251 | hap 40 | C2 |     | KM675156 |          |
| 20110301 | hap 56 | C2 |     | KM675172 |          |
| 20110302 | hap 56 | C2 |     | KM675172 |          |
| 20110303 | hap 56 | C2 |     | KM675172 |          |
| 20110304 | hap 56 | C2 |     | KM675172 |          |
| 20110305 | hap 56 | C2 |     | KM675172 |          |
| 20110306 | hap 56 | C2 |     | KM675172 |          |
| 20110307 | hap 56 | C2 | III | KM675172 | KM675083 |
| 20110309 | hap 56 | C2 |     | KM675172 |          |
| 20110310 | hap 56 | C2 |     | KM675172 |          |
| 20110311 | hap 56 | C2 |     | KM675172 |          |
| 20110311 | hap 56 | C2 |     | KM675172 |          |
| 20110312 | hap 56 | C2 |     | KM675172 |          |

|    |  |     |       |          |          |        |     |          |          |          |
|----|--|-----|-------|----------|----------|--------|-----|----------|----------|----------|
|    |  |     |       | 20110313 | hap 56   | C2     |     | KM675172 |          |          |
|    |  |     |       | 20110314 | hap 56   | C2     |     | KM675172 |          |          |
|    |  |     |       | 20110315 | hap 56   | C2     |     | KM675172 |          |          |
|    |  |     |       | 20110316 | hap 56   | C2     |     | KM675172 |          |          |
|    |  |     |       | 20110317 | hap 56   | C2     |     | KM675172 |          |          |
|    |  |     |       | 20110318 | hap 56   | C2     |     | KM675172 |          |          |
|    |  |     |       | 20110319 | hap 56   | C2     |     | KM675172 |          |          |
|    |  |     |       | 20110320 | hap 56   | C2     |     | KM675172 |          |          |
|    |  |     |       | 20110321 | hap 56   | C2     |     | KM675172 |          |          |
|    |  |     |       | 20110322 | hap 56   | C2     |     | KM675172 |          |          |
|    |  |     |       | 20110323 | hap 56   | C2     |     | KM675172 |          |          |
|    |  |     |       | 20110324 | hap 56   | C2     |     | KM675172 |          |          |
|    |  |     |       | 20110325 | hap 56   | C2     |     | KM675172 |          |          |
|    |  |     |       | 20110326 | hap 56   | C2     | III | KM675172 | KM675083 |          |
|    |  |     |       | 20110327 | hap 56   | C2     |     | KM675172 |          |          |
| 16 |  | 118 | 30.32 | 14       | 20101510 | hap 52 | C2  | III      | KM675168 | KM675063 |
|    |  |     |       |          | 20101511 | hap 52 | C2  |          | KM675168 |          |
|    |  |     |       |          | 20101515 | hap 52 | C2  |          | KM675168 |          |
|    |  |     |       |          | 20101520 | hap 52 | C2  |          | KM675168 |          |
|    |  |     |       |          | 20101530 | hap 52 | C2  |          | KM675168 |          |
|    |  |     |       |          | 20101531 | hap 52 | C2  |          | KM675168 |          |
|    |  |     |       |          | 20101532 | hap 52 | C2  |          | KM675168 |          |
|    |  |     |       |          | 20101533 | hap 52 | C2  |          | KM675168 |          |
|    |  |     |       |          | 20101534 | hap 52 | C2  |          | KM675168 |          |
|    |  |     |       |          | 20101535 | hap 52 | C2  |          | KM675168 |          |
|    |  |     |       |          | 20101536 | hap 52 | C2  |          | KM675168 |          |

17

113.76

29.51

28

|          |        |    |     |          |          |
|----------|--------|----|-----|----------|----------|
| 20101507 | hap 52 | C2 | III | KM675168 | KM675089 |
| 20101508 | hap 52 | C2 |     | KM675168 |          |
| 20101509 | hap 52 | C2 |     | KM675168 |          |
| 20101101 | hap 46 | C2 |     | KM675162 |          |
| 20101102 | hap 42 | C2 | III | KM675158 | KM675062 |
| 20101103 | hap 46 | C2 |     | KM675162 |          |
| 20101104 | hap 44 | C2 | III | KM675160 | KM675062 |
| 20101106 | hap 47 | C2 |     | KM675163 |          |
| 20101107 | hap 43 | C2 | III | KM675159 | KM675062 |
| 20101108 | hap 45 | C2 |     | KM675161 |          |
| 20101109 | hap 45 | C2 |     | KM675161 |          |
| 20101428 | hap 45 | C2 |     | KM675161 |          |
| 20101429 | hap 45 | C2 |     | KM675161 |          |
| 20101430 | hap 48 | C2 |     | KM675164 |          |
| 20101432 | hap 48 | C2 |     | KM675164 |          |
| 20101433 | hap 45 | C2 |     | KM675161 |          |
| 20101434 | hap 45 | C2 |     | KM675161 |          |
| 20101435 | hap 45 | C2 | III | KM675161 | KM675062 |
| 20101436 | hap 45 | C2 |     | KM675161 |          |
| 20101437 | hap 45 | C2 |     | KM675161 |          |
| 20101438 | hap 45 | C2 |     | KM675161 |          |
| 20101439 | hap 45 | C2 |     | KM675161 |          |
| 20101440 | hap 45 | C2 |     | KM675161 |          |
| 20101441 | hap 48 | C2 |     | KM675164 |          |
| 20101442 | hap 45 | C2 |     | KM675161 |          |
| 20101443 | hap 48 | C2 |     | KM675164 |          |

|    |        |       |    |          |        |    |     |          |          |
|----|--------|-------|----|----------|--------|----|-----|----------|----------|
|    |        |       |    | 20101444 | hap 48 | C2 |     | KM675164 |          |
|    |        |       |    | 20101445 | hap 49 | C2 |     | KM675165 |          |
|    |        |       |    | 20101446 | hap 45 | C2 |     | KM675161 |          |
|    |        |       |    | 20101447 | hap 48 | C2 |     | KM675164 |          |
|    |        |       |    | 20101448 | hap 48 | C2 |     | KM675164 |          |
| 18 | 116.07 | 30.74 | 30 | 1004080  | hap 51 | C2 |     | KM675167 |          |
|    |        |       |    | 1004081  | hap 51 | C2 |     | KM675167 |          |
|    |        |       |    | 1004082  | hap 51 | C2 | III | KM675167 | KM675065 |
|    |        |       |    | 1004083  | hap 51 | C2 |     | KM675167 |          |
|    |        |       |    | 1004084  | hap 51 | C2 |     | KM675167 |          |
|    |        |       |    | 1004085  | hap 51 | C2 |     | KM675167 |          |
|    |        |       |    | 1004086  | hap 51 | C2 |     | KM675167 |          |
|    |        |       |    | 1004087  | hap 51 | C2 |     | KM675167 |          |
|    |        |       |    | 1004088  | hap 51 | C2 |     | KM675167 |          |
|    |        |       |    | 1004089  | hap 51 | C2 |     | KM675167 |          |
|    |        |       |    | 1004090  | hap 51 | C2 | III | KM675167 | KM675065 |
|    |        |       |    | 1004091  | hap 51 | C2 |     | KM675167 |          |
|    |        |       |    | 1004092  | hap 51 | C2 |     | KM675167 |          |
|    |        |       |    | 1004093  | hap 51 | C2 |     | KM675167 |          |
|    |        |       |    | 1004094  | hap 51 | C2 |     | KM675167 |          |
|    |        |       |    | 1004095  | hap 51 | C2 |     | KM675167 |          |
|    |        |       |    | 1004096  | hap 51 | C2 |     | KM675167 |          |
|    |        |       |    | 1004097  | hap 51 | C2 |     | KM675167 |          |
|    |        |       |    | 1004098  | hap 51 | C2 |     | KM675167 |          |
|    |        |       |    | 1004099  | hap 51 | C2 |     | KM675167 |          |
|    |        |       |    | 1004100  | hap 51 | C2 |     | KM675167 |          |



|    |        |       |    |          |        |    |     |          |          |
|----|--------|-------|----|----------|--------|----|-----|----------|----------|
|    |        |       |    | 1004101  | hap 51 | C2 |     | KM675167 |          |
|    |        |       |    | 1004102  | hap 51 | C2 |     | KM675167 |          |
|    |        |       |    | 1004103  | hap 51 | C2 | III | KM675167 | KM675065 |
|    |        |       |    | 1004104  | hap 51 | C2 |     | KM675167 |          |
|    |        |       |    | 1004105  | hap 51 | C2 |     | KM675167 |          |
|    |        |       |    | 1004106  | hap 51 | C2 |     | KM675167 |          |
|    |        |       |    | 1004107  | hap 51 | C2 |     | KM675167 |          |
|    |        |       |    | 1004108  | hap 51 | C2 |     | KM675167 |          |
|    |        |       |    | 1004109  | hap 51 | C2 |     | KM675167 |          |
| 19 | 115.41 | 31.38 | 26 | 20101276 | hap 55 | C2 |     | KM675171 |          |
|    |        |       |    | 20101277 | hap 55 | C2 | III | KM675171 | KM675061 |
|    |        |       |    | 20101278 | hap 55 | C2 |     | KM675171 |          |
|    |        |       |    | 20101279 | hap 55 | C2 | III | KM675171 | KM675061 |
|    |        |       |    | 20101280 | hap 55 | C2 |     | KM675171 |          |
|    |        |       |    | 20101281 | hap 55 | C2 |     | KM675171 |          |
|    |        |       |    | 20101282 | hap 55 | C2 |     | KM675171 |          |
|    |        |       |    | 20101283 | hap 55 | C2 |     | KM675171 |          |
|    |        |       |    | 20101284 | hap 55 | C2 |     | KM675171 |          |
|    |        |       |    | 20101285 | hap 55 | C2 |     | KM675171 |          |
|    |        |       |    | 20101286 | hap 55 | C2 |     | KM675171 |          |
|    |        |       |    | 20101287 | hap 55 | C2 |     | KM675171 |          |
|    |        |       |    | 20101288 | hap 55 | C2 |     | KM675171 |          |
|    |        |       |    | 20101289 | hap 55 | C2 | III | KM675171 | KM675061 |
|    |        |       |    | 20101290 | hap 55 | C2 |     | KM675171 |          |
|    |        |       |    | 20101291 | hap 55 | C2 |     | KM675171 |          |
|    |        |       |    | 20101292 | hap 55 | C2 |     | KM675171 |          |

|    |        |       |    |          |        |    |     |          |          |
|----|--------|-------|----|----------|--------|----|-----|----------|----------|
|    |        |       |    | 20101293 | hap 55 | C2 |     | KM675171 |          |
|    |        |       |    | 20101294 | hap 55 | C2 |     | KM675171 |          |
|    |        |       |    | 20101295 | hap 55 | C2 |     | KM675171 |          |
|    |        |       |    | 20101296 | hap 55 | C2 |     | KM675171 |          |
|    |        |       |    | 20101297 | hap 55 | C2 |     | KM675171 |          |
|    |        |       |    | 20101298 | hap 55 | C2 |     | KM675171 |          |
|    |        |       |    | 20101300 | hap 55 | C2 |     | KM675171 |          |
|    |        |       |    | 20101301 | hap 55 | C2 |     | KM675171 |          |
|    |        |       |    | 20101303 | hap 55 | C2 |     | KM675171 |          |
| 20 | 118.02 | 27.95 | 21 | 1004059  | hap 50 | C2 |     | KM675166 |          |
|    |        |       |    | 1004060  | hap 50 | C2 |     | KM675166 |          |
|    |        |       |    | 1004061  | hap 50 | C2 |     | KM675166 |          |
|    |        |       |    | 1004062  | hap 50 | C2 |     | KM675166 |          |
|    |        |       |    | 1004063  | hap 50 | C2 |     | KM675166 |          |
|    |        |       |    | 1004064  | hap 50 | C2 | III | KM675166 | KM675081 |
|    |        |       |    | 1004065  | hap 50 | C2 |     | KM675166 |          |
|    |        |       |    | 1004066  | hap 50 | C2 |     | KM675166 |          |
|    |        |       |    | 1004067  | hap 50 | C2 |     | KM675166 |          |
|    |        |       |    | 1004068  | hap 50 | C2 | III | KM675166 | KM675081 |
|    |        |       |    | 1004069  | hap 50 | C2 |     | KM675166 |          |
|    |        |       |    | 1004070  | hap 50 | C2 |     | KM675166 |          |
|    |        |       |    | 1004071  | hap 50 | C2 |     | KM675166 |          |
|    |        |       |    | 1004072  | hap 50 | C2 |     | KM675166 |          |
|    |        |       |    | 1004073  | hap 50 | C2 |     | KM675166 |          |
|    |        |       |    | 1004074  | hap 50 | C2 |     | KM675166 |          |
|    |        |       |    | 1004075  | hap 50 | C2 |     | KM675166 |          |

|    |        |       |    |          |         |    |     |          |          |
|----|--------|-------|----|----------|---------|----|-----|----------|----------|
|    |        |       |    | 1004076  | hap 50  | C2 |     | KM675166 |          |
|    |        |       |    | 1004077  | hap 50  | C2 |     | KM675166 |          |
|    |        |       |    | 1004078  | hap 50  | C2 |     | KM675166 |          |
|    |        |       |    | 1004079  | hap 50  | C2 | III | KM675166 | KM675090 |
| 21 | 117.81 | 29.55 | 12 | 20110329 | hap 57  | C1 | III | KM675173 | KM675067 |
|    |        |       |    | 20110330 | hap 57  | C1 |     | KM675173 |          |
|    |        |       |    | 20110331 | hap 57  | C1 | III | KM675173 | KM675067 |
|    |        |       |    | 20110332 | hap 57  | C1 |     | KM675173 |          |
|    |        |       |    | 20110333 | hap 57  | C1 |     | KM675173 |          |
|    |        |       |    | 20110334 | hap 57  | C1 |     | KM675173 |          |
|    |        |       |    | 20110335 | hap 57  | C1 |     | KM675173 |          |
|    |        |       |    | 20110336 | hap 57  | C1 |     | KM675173 |          |
|    |        |       |    | 20110337 | hap 57  | C1 | III | KM675173 | KM675067 |
|    |        |       |    | 20110338 | hap 57  | C1 |     | KM675173 |          |
|    |        |       |    | 20110339 | hap 57  | C1 |     | KM675173 |          |
|    |        |       |    | 20110340 | hap 57  | C1 |     | KM675173 |          |
| 22 | 122.45 | 40.24 | 30 | 20120802 | hap 68  | C1 |     | KM675182 | KM675098 |
|    |        |       |    | 20120803 | hap 110 | C1 |     | KM675224 |          |
|    |        |       |    | 20120804 | hap 105 | C1 |     | KM675219 | KM675101 |
|    |        |       |    | 20120805 | hap 70  | C1 |     | KM675184 | KM675103 |
|    |        |       |    | 20120806 | hap 71  | C1 |     | KM675185 | KM675104 |
|    |        |       |    | 20120807 | hap 74  | C1 |     | KM675188 | KM675087 |
|    |        |       |    | 20120808 | hap 75  | C1 |     | KM675189 | KM675097 |
|    |        |       |    | 20120809 | hap 73  | C1 |     | KM675187 | KM675105 |
|    |        |       |    | 20120810 | hap 77  | C1 |     | KM675191 |          |
|    |        |       |    | 20120811 | hap 69  | C1 |     | KM675183 | KM675096 |

|    |        |       |   |          |         |    |          |          |
|----|--------|-------|---|----------|---------|----|----------|----------|
|    |        |       |   | 20120812 | hap 122 | C1 | KM675236 |          |
|    |        |       |   | 20120813 | hap 111 | C1 | KM675225 |          |
|    |        |       |   | 20120814 | hap 123 | C1 | KM675237 |          |
|    |        |       |   | 20120815 | hap 110 | C1 | KM675224 |          |
|    |        |       |   | 20120816 | hap 78  | C1 | KM675192 |          |
|    |        |       |   | 20120817 | hap 72  | C1 | KM675186 | KM675099 |
|    |        |       |   | 20120818 | hap 71  | C1 | KM675185 |          |
|    |        |       |   | 20120819 | hap 104 | C1 | KM675218 | KM675100 |
|    |        |       |   | 20120820 | hap 76  | C1 | KM675190 | KM675076 |
|    |        |       |   | 20120821 | hap 122 | C1 | KM675236 |          |
|    |        |       |   | 20120822 | hap 112 | C1 | KM675226 |          |
|    |        |       |   | 20120823 | hap 106 | C1 | KM675220 |          |
|    |        |       |   | 20120824 | hap 102 | C1 | KM675216 | KM675076 |
|    |        |       |   | 20120825 | hap 103 | C1 | KM675217 | KM675091 |
|    |        |       |   | 20120826 | hap 107 | C1 | KM675221 |          |
|    |        |       |   | 20120827 | hap 114 | C1 | KM675228 |          |
|    |        |       |   | 20120828 | hap 109 | C1 | KM675223 |          |
|    |        |       |   | 20120829 | hap 108 | C1 | KM675222 |          |
|    |        |       |   | 20120830 | hap 113 | C1 | KM675227 |          |
|    |        |       |   | 20120831 | hap 79  | C1 | KM675193 | KM675102 |
| 23 | 122.36 | 40.03 | 3 | 20120834 | hap 120 | C1 | KM675234 | KM675109 |
|    |        |       |   | 20120835 | hap 84  | C1 | KM675198 | KM675084 |
|    |        |       |   | 20120836 | hap 120 | C1 | KM675234 |          |
| 24 | 122.48 | 40.09 | 3 | 20120837 | hap 116 | C1 | KM675230 | KM675107 |
|    |        |       |   | 20120838 | hap 115 | C1 | KM675229 | KM675108 |
|    |        |       |   | 20120839 | hap 102 | C1 | KM675216 |          |

|    |        |       |    |          |         |    |          |          |
|----|--------|-------|----|----------|---------|----|----------|----------|
| 25 | 115.47 | 39.63 | 1  | 20120801 | hap 119 | C1 | KM675233 | KM675078 |
| 26 | 116.45 | 40.5  | 28 | 20120832 | hap 81  | C1 | KM675195 |          |
|    |        |       |    | 20120833 | hap 81  | C1 | KM675195 | KM675078 |
|    |        |       |    | 20120834 | hap 86  | C1 | KM675200 |          |
|    |        |       |    | 20120835 | hap 81  | C1 | KM675195 |          |
|    |        |       |    | 20120836 | hap 81  | C1 | KM675195 |          |
|    |        |       |    | 20120837 | hap 118 | C1 | KM675232 | KM675079 |
|    |        |       |    | 20120838 | hap 81  | C1 | KM675195 |          |
|    |        |       |    | 20120839 | hap 86  | C1 | KM675200 |          |
|    |        |       |    | 20120840 | hap 80  | C1 | KM675194 |          |
|    |        |       |    | 20120841 | hap 81  | C1 | KM675195 |          |
|    |        |       |    | 20120842 | hap 118 | C1 | KM675232 |          |
|    |        |       |    | 20120843 | hap 85  | C1 | KM675199 | KM675079 |
|    |        |       |    | 20120845 | hap 87  | C1 | KM675201 |          |
|    |        |       |    | 20120846 | hap 83  | C1 | KM675197 | KM675078 |
|    |        |       |    | 20120847 | hap 87  | C1 | KM675201 |          |
|    |        |       |    | 20120848 | hap 82  | C1 | KM675196 | KM675078 |
|    |        |       |    | 20120849 | hap 87  | C1 | KM675201 |          |
|    |        |       |    | 20120850 | hap 80  | C1 | KM675194 |          |
|    |        |       |    | 20120851 | hap 83  | C1 | KM675197 |          |
|    |        |       |    | 20120852 | hap 80  | C1 | KM675194 | KM675079 |
|    |        |       |    | 20120853 | hap 80  | C1 | KM675194 |          |
|    |        |       |    | 20120854 | hap 81  | C1 | KM675195 |          |
|    |        |       |    | 20120855 | hap 83  | C1 | KM675197 |          |
|    |        |       |    | 20120856 | hap 88  | C1 | KM675202 | KM675078 |
|    |        |       |    | 20120857 | hap 117 | C1 | KM675231 | KM675078 |

|    |        |       |    |          |         |    |    |          |          |
|----|--------|-------|----|----------|---------|----|----|----------|----------|
|    |        |       |    | 20120858 | hap 121 | C1 |    | KM675235 |          |
|    |        |       |    | 20120859 | hap 81  | C1 |    | KM675195 |          |
|    |        |       |    | 20120860 | hap 80  | C1 |    | KM675194 |          |
| 27 | 108.74 | 30.19 | 30 | 20110901 | hap 65  | B2 | II | KM675181 | KM675088 |
|    |        |       |    | 20110902 | hap 65  | B2 | II | KM675181 | KM675088 |
|    |        |       |    | 20110903 | hap 65  | B2 |    | KM675181 |          |
|    |        |       |    | 20110904 | hap 65  | B2 |    | KM675181 |          |
|    |        |       |    | 20110905 | hap 65  | B2 |    | KM675181 |          |
|    |        |       |    | 20110906 | hap 65  | B2 |    | KM675181 |          |
|    |        |       |    | 20110907 | hap 65  | B2 | II | KM675181 | KM675088 |
|    |        |       |    | 20110908 | hap 65  | B2 |    | KM675181 |          |
|    |        |       |    | 20110909 | hap 65  | B2 |    | KM675181 |          |
|    |        |       |    | 20110910 | hap 65  | B2 |    | KM675181 |          |
|    |        |       |    | 20110911 | hap 65  | B2 |    | KM675181 |          |
|    |        |       |    | 20110912 | hap 65  | B2 |    | KM675181 |          |
|    |        |       |    | 20110913 | hap 65  | B2 |    | KM675181 |          |
|    |        |       |    | 20110914 | hap 65  | B2 |    | KM675181 |          |
|    |        |       |    | 20110915 | hap 65  | B2 |    | KM675181 |          |
|    |        |       |    | 20110916 | hap 65  | B2 |    | KM675181 |          |
|    |        |       |    | 20110917 | hap 65  | B2 |    | KM675181 |          |
|    |        |       |    | 20110918 | hap 65  | B2 |    | KM675181 |          |
|    |        |       |    | 20110919 | hap 65  | B2 |    | KM675181 |          |
|    |        |       |    | 20110920 | hap 65  | B2 |    | KM675181 |          |
|    |        |       |    | 20110921 | hap 65  | B2 |    | KM675181 |          |
|    |        |       |    | 20110922 | hap 65  | B2 |    | KM675181 |          |
|    |        |       |    | 20110923 | hap 65  | B2 |    | KM675181 |          |

|    |     |       |    |          |        |    |     |          |          |
|----|-----|-------|----|----------|--------|----|-----|----------|----------|
|    |     |       |    | 20110924 | hap 65 | B2 |     | KM675181 |          |
|    |     |       |    | 20110925 | hap 65 | B2 |     | KM675181 |          |
|    |     |       |    | 20110926 | hap 65 | B2 |     | KM675181 |          |
|    |     |       |    | 20110927 | hap 65 | B2 |     | KM675181 |          |
|    |     |       |    | 20110928 | hap 65 | B2 |     | KM675181 |          |
|    |     |       |    | 20110929 | hap 65 | B2 |     | KM675181 |          |
|    |     |       |    | 20110930 | hap 65 | B2 |     | KM675181 |          |
| 28 |     |       |    | 20101537 | hap 62 | B2 | II  | KM675178 | KM675064 |
|    | 107 |       |    | 20101538 | hap 59 | B2 |     | KM675175 |          |
|    |     | 34.18 |    | 20101539 | hap 59 | B2 |     | KM675175 |          |
|    |     |       | 32 | 20101540 | hap 59 | B2 | III | KM675175 | KM675073 |
|    |     |       |    | 20101541 | hap 59 | B2 | II  | KM675175 | KM675064 |
|    |     |       |    | 20101542 | hap 59 | B2 |     | KM675175 |          |
|    |     |       |    | 20101543 | hap 59 | B2 |     | KM675175 |          |
|    |     |       |    | 20101544 | hap 59 | B2 |     | KM675175 |          |
|    |     |       |    | 20101545 | hap 59 | B2 | II  | KM675175 | KM675064 |
|    |     |       |    | 20101546 | hap 59 | B2 |     | KM675175 |          |
|    |     |       |    | 20101547 | hap 59 | B2 |     | KM675175 |          |
|    |     |       |    | 20101548 | hap 59 | B2 |     | KM675175 |          |
|    |     |       |    | 20101549 | hap 59 | B2 |     | KM675175 |          |
|    |     |       |    | 20101550 | hap 59 | B2 |     | KM675175 |          |
|    |     |       |    | 20101551 | hap 59 | B2 |     | KM675175 |          |
|    |     |       |    | 20101552 | hap 59 | B2 |     | KM675175 |          |
|    |     |       |    | 20101553 | hap 59 | B2 |     | KM675175 |          |
|    |     |       |    | 20101554 | hap 59 | B2 |     | KM675175 |          |
|    |     |       |    | 20101555 | hap 59 | B2 |     | KM675175 |          |

|    |        |       |    |          |        |    |    |          |          |
|----|--------|-------|----|----------|--------|----|----|----------|----------|
|    |        |       |    | 20101556 | hap 59 | B2 |    | KM675175 |          |
|    |        |       |    | 20101557 | hap 59 | B2 |    | KM675175 |          |
|    |        |       |    | 20101558 | hap 59 | B2 |    | KM675175 |          |
|    |        |       |    | 20101559 | hap 59 | B2 |    | KM675175 |          |
|    |        |       |    | 20101560 | hap 59 | B2 |    | KM675175 |          |
|    |        |       |    | 20101561 | hap 59 | B2 |    | KM675175 |          |
|    |        |       |    | 20101562 | hap 59 | B2 |    | KM675175 |          |
|    |        |       |    | 20101563 | hap 59 | B2 |    | KM675175 |          |
|    |        |       |    | 20101564 | hap 59 | B2 |    | KM675175 |          |
|    |        |       |    | 20101595 | hap 59 | B2 |    | KM675175 |          |
|    |        |       |    | 20101596 | hap 59 | B2 |    | KM675175 |          |
|    |        |       |    | 20101597 | hap 59 | B2 |    | KM675175 |          |
|    |        |       |    | 20101598 | hap 59 | B2 | II | KM675175 | KM675064 |
| 29 | 107.96 | 33.71 | 22 | 20101479 | hap 58 | B2 | II | KM675174 | KM675064 |
|    |        |       |    | 20101480 | hap 58 | B2 |    | KM675174 |          |
|    |        |       |    | 20101481 | hap 58 | B2 |    | KM675174 |          |
|    |        |       |    | 20101482 | hap 58 | B2 |    | KM675174 |          |
|    |        |       |    | 20101483 | hap 58 | B2 | II | KM675174 | KM675064 |
|    |        |       |    | 20101484 | hap 58 | B2 |    | KM675174 |          |
|    |        |       |    | 20101485 | hap 58 | B2 |    | KM675174 |          |
|    |        |       |    | 20101486 | hap 58 | B2 |    | KM675174 |          |
|    |        |       |    | 20101487 | hap 58 | B2 |    | KM675174 |          |
|    |        |       |    | 20101488 | hap 58 | B2 |    | KM675174 |          |
|    |        |       |    | 20101489 | hap 58 | B2 |    | KM675174 |          |
|    |        |       |    | 20101490 | hap 58 | B2 |    | KM675174 |          |
|    |        |       |    | 20101491 | hap 58 | B2 |    | KM675174 |          |



|    |        |       |    |          |        |    |    |          |          |
|----|--------|-------|----|----------|--------|----|----|----------|----------|
|    |        |       |    | 20101492 | hap 58 | B2 |    | KM675174 |          |
|    |        |       |    | 20101494 | hap 58 | B2 |    | KM675174 |          |
|    |        |       |    | 20101495 | hap 58 | B2 |    | KM675174 |          |
|    |        |       |    | 20101496 | hap 58 | B2 |    | KM675174 |          |
|    |        |       |    | 20101497 | hap 58 | B2 |    | KM675174 |          |
|    |        |       |    | 20101499 | hap 58 | B2 |    | KM675174 |          |
|    |        |       |    | 20101502 | hap 58 | B2 |    | KM675174 |          |
|    |        |       |    | 20101503 | hap 61 | B2 | II | KM675177 | KM675064 |
|    |        |       |    | 20101506 | hap 58 | B2 |    | KM675174 |          |
| 30 | 108    | 33.82 | 3  | 20101407 | hap 63 | B1 | II | KM675179 | KM675069 |
|    |        |       |    | 20101409 | hap 64 | B1 |    | KM675180 |          |
|    |        |       |    | 20101426 | hap 63 | B1 | II | KM675179 | KM675068 |
| 31 | 106.99 | 34.27 | 24 | 20101567 | hap 60 | B2 | II | KM675176 | KM675064 |
|    |        |       |    | 20101569 | hap 60 | B2 | II | KM675176 | KM675064 |
|    |        |       |    | 20101571 | hap 60 | B2 | II | KM675176 | KM675064 |
|    |        |       |    | 20101572 | hap 60 | B2 | II | KM675176 | KM675064 |
|    |        |       |    | 20101573 | hap 60 | B2 | II | KM675176 | KM675064 |
|    |        |       |    | 20101574 | hap 60 | B2 | II | KM675176 | KM675064 |
|    |        |       |    | 20101575 | hap 60 | B2 |    | KM675176 |          |
|    |        |       |    | 20101576 | hap 60 | B2 |    | KM675176 |          |
|    |        |       |    | 20101577 | hap 60 | B2 | II | KM675176 | KM675064 |
|    |        |       |    | 20101578 | hap 60 | B2 |    | KM675176 |          |
|    |        |       |    | 20101579 | hap 60 | B2 | II | KM675176 | KM675064 |
|    |        |       |    | 20101581 | hap 60 | B2 |    | KM675176 |          |
|    |        |       |    | 20101582 | hap 60 | B2 | II | KM675176 | KM675064 |
|    |        |       |    | 20101583 | hap 60 | B2 | II | KM675176 | KM675064 |

32                    111.84            34.93            27

|          |         |    |    |          |          |
|----------|---------|----|----|----------|----------|
| 20101584 | hap 60  | B2 | II | KM675176 | KM675064 |
| 20101585 | hap 60  | B2 | II | KM675176 | KM675064 |
| 20101586 | hap 60  | B2 | II | KM675176 | KM675064 |
| 20101587 | hap 60  | B2 | II | KM675176 | KM675064 |
| 20101588 | hap 60  | B2 | II | KM675176 | KM675064 |
| 20101588 |         |    |    |          | KM675064 |
| 20101590 | hap 60  | B2 | II | KM675176 | KM675064 |
| 20101591 | hap 60  | B2 | II | KM675176 | KM675064 |
| 20101592 | hap 60  | B2 | II | KM675176 | KM675064 |
| 20101594 | hap 60  | B2 | II | KM675176 | KM675064 |
| 20120862 | hap 91  | B1 |    | KM675205 |          |
| 20120863 | hap 91  | B1 | II | KM675205 | KM675064 |
| 20120864 | hap 91  | B1 |    | KM675205 |          |
| 20120865 | hap 92  | B1 |    | KM675206 |          |
| 20120866 | hap 91  | B1 |    | KM675205 |          |
| 20120867 | hap 91  | B1 |    | KM675205 |          |
| 20120868 | hap 90  | B1 | II | KM675204 | KM675064 |
| 20120869 | hap 101 | B2 |    | KM675215 |          |
| 20120870 | hap 92  | B1 |    | KM675206 |          |
| 20120871 | hap 91  | B1 |    | KM675205 |          |
| 20120872 | hap 92  | B1 |    | KM675206 |          |
| 20120874 | hap 92  | B1 |    | KM675206 |          |
| 20120876 | hap 91  | B1 |    | KM675205 |          |
| 20120878 | hap 92  | B1 |    | KM675206 |          |
| 20120879 | hap 101 | B2 | II | KM675215 | KM675064 |
| 20120880 | hap 92  | B1 |    | KM675206 |          |

33

111.69

35.33

29

|          |         |    |    |          |          |
|----------|---------|----|----|----------|----------|
| 20120881 | hap 100 | B1 | II | KM675214 | KM675064 |
| 20120882 | hap 91  | B1 |    | KM675205 |          |
| 20120883 | hap 92  | B1 | II | KM675206 | KM675064 |
| 20120884 | hap 91  | B1 |    | KM675205 |          |
| 20120885 | hap 124 | B2 | II | KM675238 | KM675064 |
| 20120886 | hap 92  | B1 |    | KM675206 |          |
| 20120888 | hap 92  | B1 |    | KM675206 |          |
| 20120889 | hap 92  | B1 |    | KM675206 |          |
| 20120890 | hap 101 | B2 |    | KM675215 |          |
| 20120922 | hap 91  | B1 |    | KM675205 |          |
| 20120923 | hap 92  | B1 |    | KM675206 |          |
| 20120892 | hap 96  | B2 |    | KM675210 |          |
| 20120893 | hap 95  | B2 | II | KM675209 | KM675092 |
| 20120894 | hap 97  | B2 |    | KM675211 |          |
| 20120895 | hap 95  | B2 |    | KM675209 |          |
| 20120896 | hap 97  | B2 |    | KM675211 |          |
| 20120897 | hap 97  | B2 |    | KM675211 |          |
| 20120898 | hap 95  | B2 |    | KM675209 |          |
| 20120899 | hap 96  | B2 |    | KM675210 |          |
| 20120900 | hap 97  | B2 |    | KM675211 |          |
| 20120901 | hap 96  | B2 |    | KM675210 |          |
| 20120902 | hap 97  | B2 |    | KM675211 |          |
| 20120903 | hap 98  | B2 |    | KM675212 |          |
| 20120904 | hap 91  | B1 |    | KM675205 |          |
| 20120905 | hap 98  | B2 | II | KM675212 | KM675094 |
| 20120906 | hap 97  | B2 | II | KM675211 | KM675064 |

34

111.02

30.8

16

|          |        |    |    |          |          |
|----------|--------|----|----|----------|----------|
| 20120907 | hap 98 | B2 |    | KM675212 |          |
| 20120908 | hap 96 | B2 | II | KM675210 | KM675093 |
| 20120909 | hap 97 | B2 |    | KM675211 |          |
| 20120910 | hap 97 | B2 |    | KM675211 |          |
| 20120911 | hap 97 | B2 |    | KM675211 |          |
| 20120913 | hap 96 | B2 |    | KM675210 |          |
| 20120914 | hap 96 | B2 |    | KM675210 |          |
| 20120915 | hap 96 | B2 |    | KM675210 |          |
| 20120916 | hap 96 | B2 |    | KM675210 |          |
| 20120917 | hap 99 | B2 | II | KM675213 | KM675094 |
| 20120918 | hap 96 | B2 |    | KM675210 |          |
| 20120919 | hap 97 | B2 |    | KM675211 |          |
| 20120920 | hap 97 | B2 |    | KM675211 |          |
| 20120921 | hap 97 | B2 |    | KM675211 |          |
| 20120924 | hap 94 | B2 |    | KM675208 | KM675064 |
| 20120925 | hap 93 | B2 | II | KM675207 |          |
| 20120926 | hap 93 | B2 |    | KM675207 |          |
| 20120927 | hap 94 | B2 |    | KM675208 |          |
| 20120928 | hap 93 | B2 |    | KM675207 |          |
| 20120929 | hap 94 | B2 |    | KM675208 |          |
| 20120930 | hap 93 | B2 |    | KM675207 | KM675064 |
| 20120931 | hap 94 | B2 | II | KM675208 |          |
| 20120932 | hap 94 | B2 |    | KM675208 |          |
| 20120933 | hap 94 | B2 |    | KM675208 |          |
| 20120934 | hap 93 | B2 |    | KM675207 | KM675064 |
| 20120935 | hap 94 | B2 | II | KM675208 |          |

35

113.92

31.86

29

|          |        |    |   |          |          |
|----------|--------|----|---|----------|----------|
| 20120936 | hap 94 | B2 |   | KM675208 |          |
| 20120937 | hap 94 | B2 |   | KM675208 |          |
| 20120938 | hap 94 | B2 |   | KM675208 |          |
| 20120939 | hap 94 | B2 |   | KM675208 |          |
| 20120940 | hap 89 | A  |   | KM675203 |          |
| 20120941 | hap 89 | A  |   | KM675203 |          |
| 20120942 | hap 89 | A  | I | KM675203 | KM675095 |
| 20120943 | hap 89 | A  |   | KM675203 |          |
| 20120944 | hap 89 | A  |   | KM675203 |          |
| 20120945 | hap 89 | A  |   | KM675203 |          |
| 20120946 | hap 89 | A  |   | KM675203 |          |
| 20120947 | hap 89 | A  |   | KM675203 |          |
| 20120948 | hap 89 | A  |   | KM675203 |          |
| 20120949 | hap 89 | A  |   | KM675203 |          |
| 20120950 | hap 89 | A  |   | KM675203 |          |
| 20120951 | hap 89 | A  |   | KM675203 |          |
| 20120952 | hap 89 | A  |   | KM675203 |          |
| 20120953 | hap 89 | A  |   | KM675203 |          |
| 20120954 | hap 89 | A  | I | KM675203 | KM675095 |
| 20120955 | hap 89 | A  |   | KM675203 |          |
| 20120956 | hap 89 | A  |   | KM675203 |          |
| 20120957 | hap 89 | A  |   | KM675203 |          |
| 20120958 | hap 89 | A  |   | KM675203 |          |
| 20120959 | hap 89 | A  |   | KM675203 |          |
| 20120960 | hap 89 | A  |   | KM675203 |          |
| 20120961 | hap 89 | A  |   | KM675203 |          |

|                     |    |   |          |         |   |          |          |
|---------------------|----|---|----------|---------|---|----------|----------|
|                     |    |   | 20120962 | hap 89  | A | KM675203 |          |
|                     |    |   | 20120963 | hap 89  | A | KM675203 |          |
|                     |    |   | 20120964 | hap 89  | A | KM675203 |          |
|                     |    |   | 20120965 | hap 89  | A | KM675203 |          |
|                     |    |   | 20120966 | hap 89  | A | KM675203 |          |
|                     |    |   | 20120967 | hap 89  | A | KM675203 |          |
|                     |    |   | 20120968 | hap 89  | A | KM675203 |          |
|                     | 36 | 2 |          | hap 66  | A | AB198971 |          |
|                     |    |   |          | hap 67  | A | AB236730 |          |
| Outgroup            |    |   |          |         |   |          |          |
| <i>R.lagowaskii</i> |    | 4 | 20101595 | hap 126 |   | KM675117 |          |
|                     |    |   | 20101596 |         |   |          | KM675112 |
|                     |    |   | 20101597 | hap 127 |   | KM675118 | KM675113 |
|                     |    |   | 20101608 | hap 128 |   | KM675119 |          |

---
