# Supplementary material for: Geological events and Pliocene climate fluctuations explain the phylogeographical pattern of the cold water fish Rhynchocypris oxycephalus (Cypriniformes: Cyprinidae) in China
Source: PubMed Central journal article supplement (PMC4219125; doi:10.1186/s12862-014-0225-9), 2014-10-25
Supplement: 12862_2014_225_MOESM2_ESM.pdf [file 12862_2014_225_MOESM2_ESM.pdf]

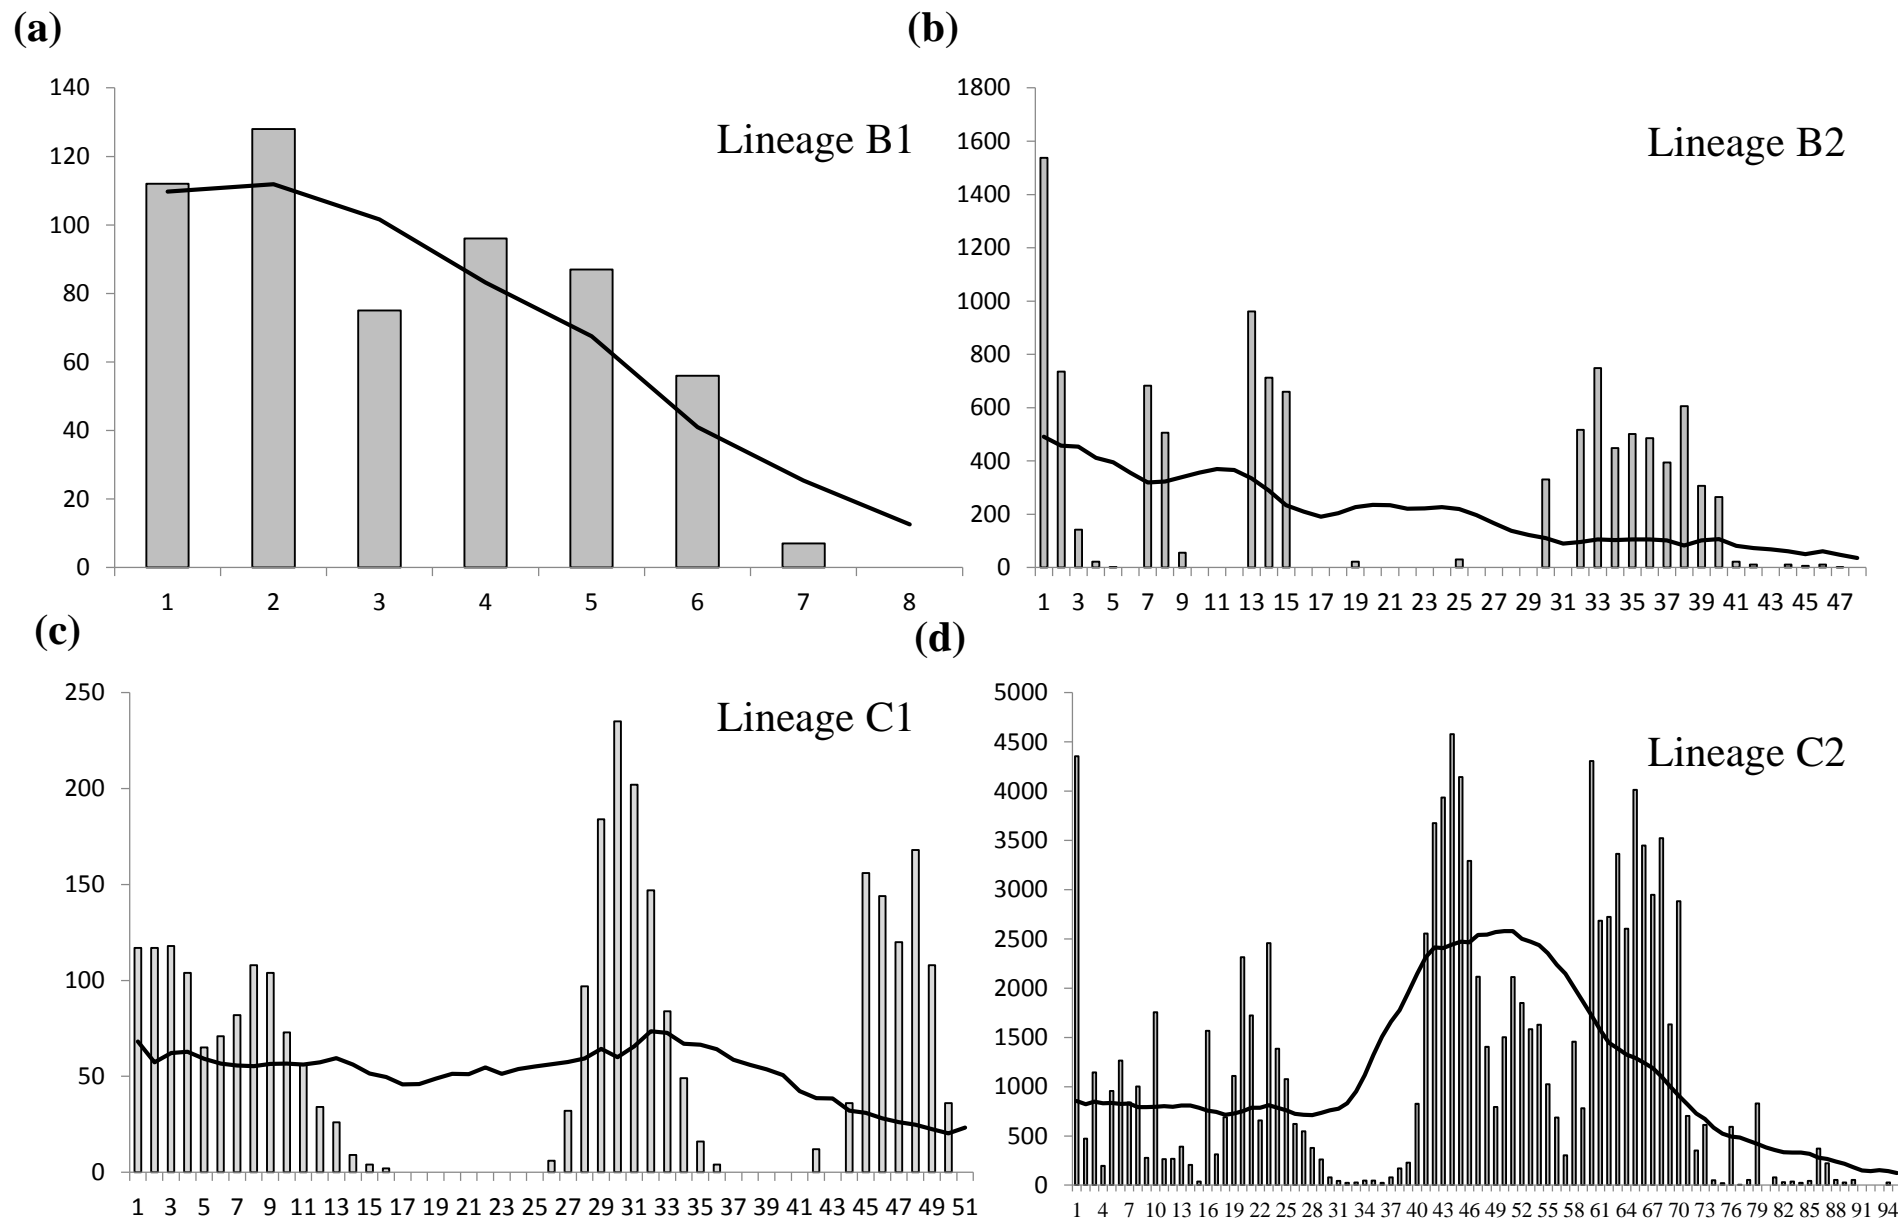

**Figure S1** Mismatch distribution for each matriline of *R. oxycephalus*. The abscissa indicates the number of pairwise differences between compared sequences. The ordinate is the frequency for each value. Histograms are the observed frequencies of pairwise divergences among sequences and the line refers to the expectation under the model of population expansion. (a–d) Mismatch distribution for the matriline B1, B2, C1 and C2, respectively.
