# Supplementary material for: Geological events and Pliocene climate fluctuations explain the phylogeographical pattern of the cold water fish Rhynchocypris oxycephalus (Cypriniformes: Cyprinidae) in China
Source: PubMed Central journal article supplement (PMC4219125; doi:10.1186/s12862-014-0225-9), 2014-10-25
Supplement: 12862_2014_225_MOESM3_ESM.pdf [file 12862_2014_225_MOESM3_ESM.pdf]

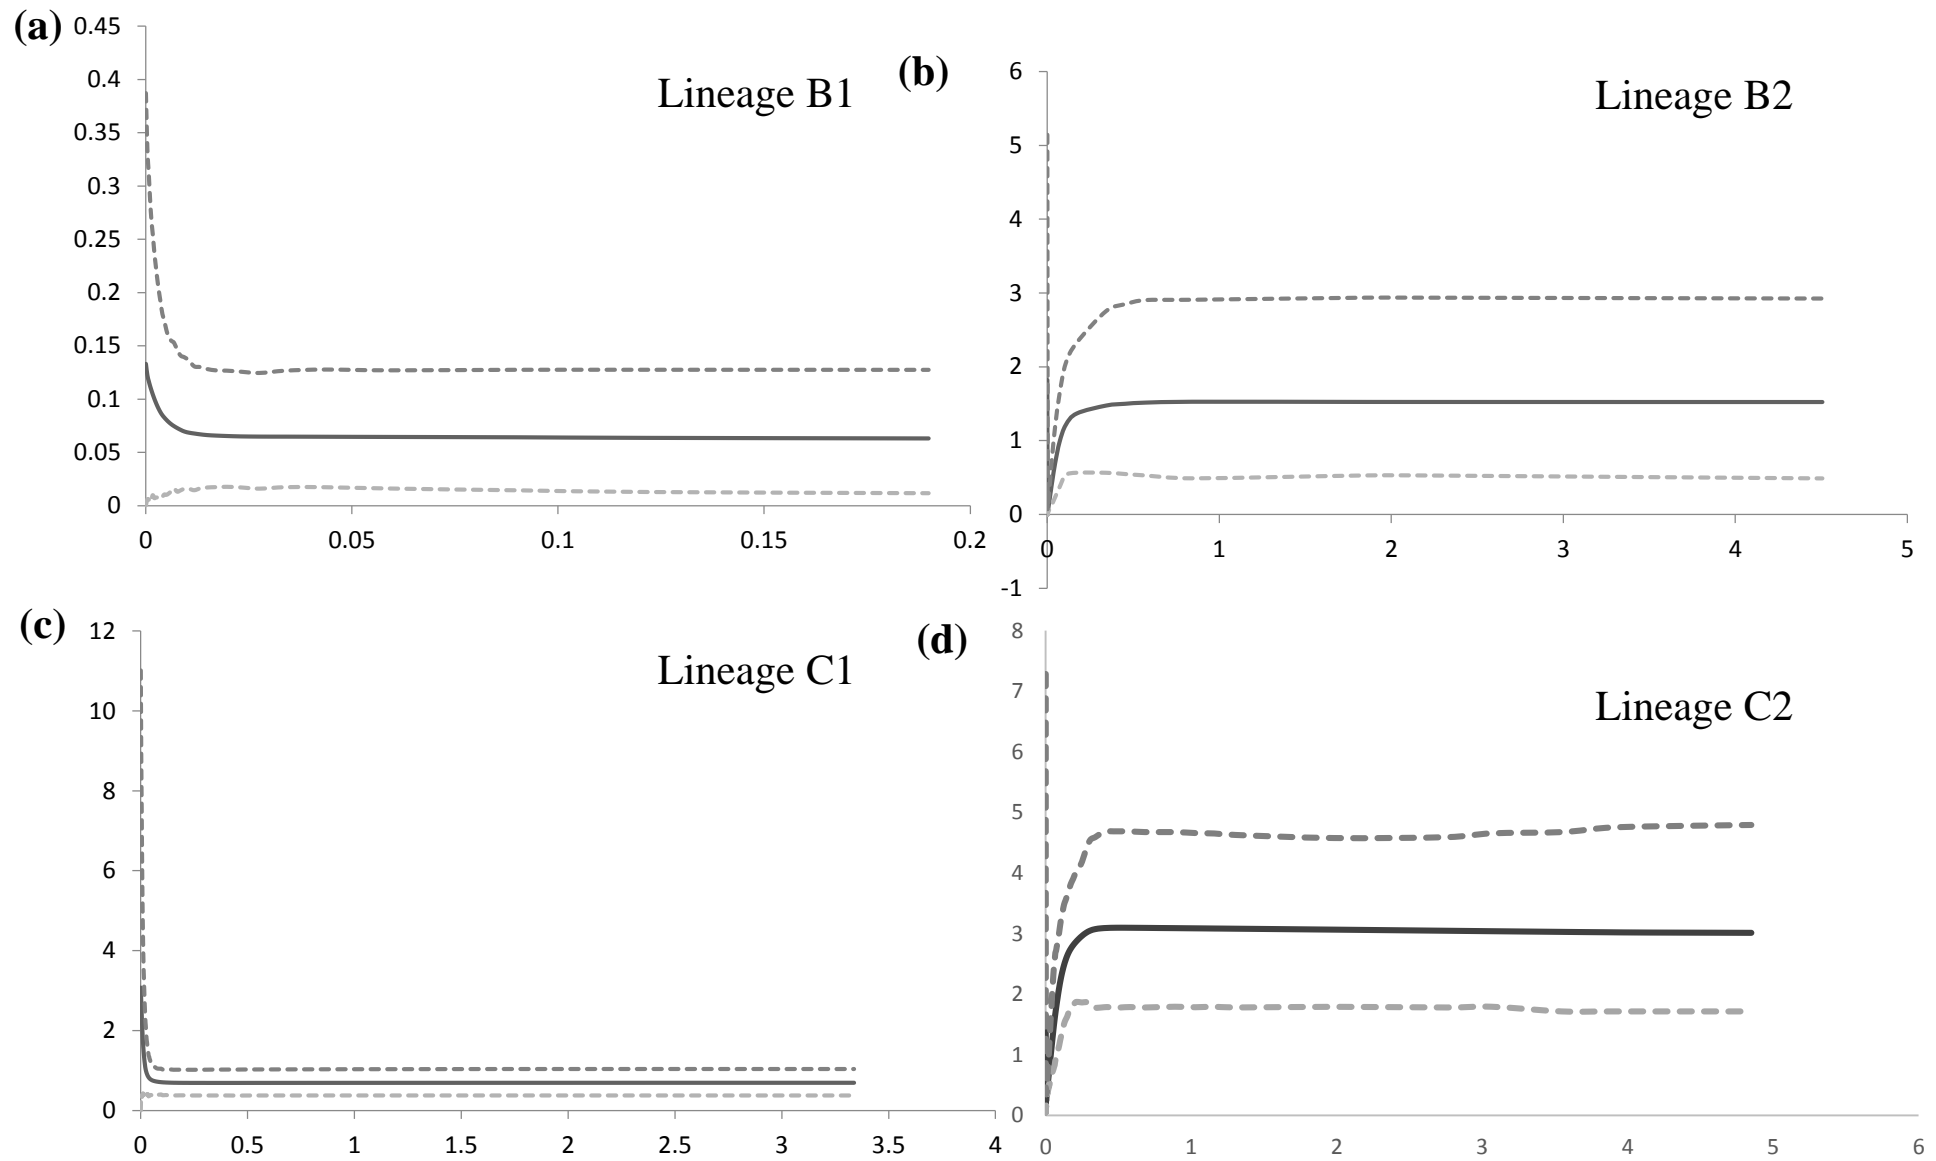

**Figure S2** Bayesian skyline plot estimated by BEAST for each matriline of *R. oxycephalus*: x-axis, time in millions of years; y-axis, effective population size (units = Net, the product of effective population size and generation length in millions of years). The mean estimate and both 95% HPD limits are indicated. (a–d) Bayesian skyline plots for matrilineages B1, B2, C1 and C2, respectively.
